# Supplementary material
Source: ML conference proceedings conference paper supplement (https://openreview.net/forum?id=UZlJY3uV6P)
Supplement: supplementary_material [file dataset_measurement.xlsx]

## Sheet: global_evaluation_measurements
total_execution_duration
12.0926

## Sheet: dataset_evaluator_parameters
section	name	map	confidence_interval_width	acceptable_ci_width	parameter	value
score_parameters	mistakes	<function mean at 0x100e687c0>	0.95
global_parameters					min_runs	10
global_parameters					max_runs	9.22337e+18

## Sheet: scores
name	value	confidence_interval_width
mistakes	18.2	3.83446

## Sheet: mean
execution_type	cache_type	request_tokens	response_tokens	total_tokens	request_cost	response_cost	total_cost	execution_duration	execution_cost
sequential	no_cache	191479	41405.6	232884	0.0957393	0.0621084	0.157848	397.841	98
sequential	with_process_cache	191479	41405.6	232884	0.0957393	0.0621084	0.157848	397.841	98
sequential	with_persistent_cache	191479	41405.6	232884	0.0957393	0.0621084	0.157848	397.841	98
parallel	no_cache	191479	41405.6	232884	0.0957393	0.0621084	0.157848	46.5681	7
parallel	with_process_cache	191479	41405.6	232884	0.0957393	0.0621084	0.157848	46.5681	7
parallel	with_persistent_cache	191479	41405.6	232884	0.0957393	0.0621084	0.157848	46.5681	7

## Sheet: sum
execution_type	cache_type	request_tokens	response_tokens	total_tokens	request_cost	response_cost	total_cost	execution_duration	execution_cost
sequential	no_cache	9573928	2070280	11644208	4.78696	3.10542	7.89238	19892.1	4900
sequential	with_process_cache	9573928	2070280	11644208	4.78696	3.10542	7.89238	19892.1	4900
sequential	with_persistent_cache	9573928	2070280	11644208	4.78696	3.10542	7.89238	19892.1	4900
parallel	no_cache	9573928	2070280	11644208	4.78696	3.10542	7.89238	2328.4	350
parallel	with_process_cache	9573928	2070280	11644208	4.78696	3.10542	7.89238	2328.4	350
parallel	with_persistent_cache	9573928	2070280	11644208	4.78696	3.10542	7.89238	2328.4	350
