# Supplementary material
Source: ML conference proceedings conference paper supplement (https://openreview.net/forum?id=UZlJY3uV6P)
Supplement: supplementary_material [file dataset_measurement.xlsx]

## Sheet: global_evaluation_measurements
total_execution_duration
314.88

## Sheet: dataset_evaluator_parameters
section	name	map	confidence_interval_width	acceptable_ci_width	parameter	value
score_parameters	success	<function mean at 0x1075680e0>	0.95
global_parameters					min_runs	10
global_parameters					max_runs	9.22337e+18

## Sheet: scores
name	value	confidence_interval_width
success	0.63	0.192563

## Sheet: mean
execution_type	cache_type	request_tokens	response_tokens	total_tokens	request_cost	response_cost	total_cost	execution_duration	execution_cost
sequential	no_cache	86029.7	8115.94	94145.6	0.215074	0.0811594	0.296234	781.745	249.38
sequential	with_process_cache	74161.4	6605.33	80766.7	0.185404	0.0660533	0.251457	634.856	217.21
sequential	with_persistent_cache	50977	3384.86	54361.9	0.127443	0.0338486	0.161291	372.627	154.24
parallel	no_cache	86029.7	8115.94	94145.6	0.215074	0.0811594	0.296234	30.9944	6
parallel	with_process_cache	74161.4	6605.33	80766.7	0.185404	0.0660533	0.251457	30.2985	6
parallel	with_persistent_cache	50977	3384.86	54361.9	0.127443	0.0338486	0.161291	22.1031	5.67

## Sheet: sum
execution_type	cache_type	request_tokens	response_tokens	total_tokens	request_cost	response_cost	total_cost	execution_duration	execution_cost
sequential	no_cache	8602971	811594	9414565	21.5074	8.11594	29.6234	78174.5	24938
sequential	with_process_cache	7416141	660533	8076674	18.5404	6.60533	25.1457	63485.6	21721
sequential	with_persistent_cache	5097702	338486	5436188	12.7443	3.38486	16.1291	37262.7	15424
parallel	no_cache	8602971	811594	9414565	21.5074	8.11594	29.6234	3099.44	600
parallel	with_process_cache	7416141	660533	8076674	18.5404	6.60533	25.1457	3029.85	600
parallel	with_persistent_cache	5097702	338486	5436188	12.7443	3.38486	16.1291	2210.31	567
