# Supplementary material
Source: ML conference proceedings conference paper supplement (https://openreview.net/forum?id=UZlJY3uV6P)
Supplement: supplementary_material [file dataset_measurement.xlsx]

## Sheet: global_evaluation_measurements
total_execution_duration
23.7741

## Sheet: dataset_evaluator_parameters
section	name	map	confidence_interval_width	acceptable_ci_width	parameter	value
score_parameters	mistakes	<function mean at 0x104764040>	0.95
global_parameters					min_runs	10
global_parameters					max_runs	9.22337e+18

## Sheet: scores
name	value	confidence_interval_width
mistakes	18.14	2.95683

## Sheet: mean
execution_type	cache_type	request_tokens	response_tokens	total_tokens	request_cost	response_cost	total_cost	execution_duration	execution_cost
sequential	no_cache	189541	42419	231960	0.0947704	0.0636284	0.158399	465.494	100
sequential	with_process_cache	189541	42419	231960	0.0947704	0.0636284	0.158399	465.494	100
sequential	with_persistent_cache	189541	42419	231960	0.0947704	0.0636284	0.158399	465.494	100
parallel	no_cache	189541	42419	231960	0.0947704	0.0636284	0.158399	50.0281	5
parallel	with_process_cache	189541	42419	231960	0.0947704	0.0636284	0.158399	50.0281	5
parallel	with_persistent_cache	189541	42419	231960	0.0947704	0.0636284	0.158399	50.0281	5

## Sheet: sum
execution_type	cache_type	request_tokens	response_tokens	total_tokens	request_cost	response_cost	total_cost	execution_duration	execution_cost
sequential	no_cache	9477040	2120948	11597988	4.73852	3.18142	7.91994	23274.7	5000
sequential	with_process_cache	9477040	2120948	11597988	4.73852	3.18142	7.91994	23274.7	5000
sequential	with_persistent_cache	9477040	2120948	11597988	4.73852	3.18142	7.91994	23274.7	5000
parallel	no_cache	9477040	2120948	11597988	4.73852	3.18142	7.91994	2501.4	250
parallel	with_process_cache	9477040	2120948	11597988	4.73852	3.18142	7.91994	2501.4	250
parallel	with_persistent_cache	9477040	2120948	11597988	4.73852	3.18142	7.91994	2501.4	250
