# Supplementary material
Source: ML conference proceedings conference paper supplement (https://openreview.net/forum?id=UZlJY3uV6P)
Supplement: supplementary_material [file dataset_measurement.xlsx]

## Sheet: global_evaluation_measurements
total_execution_duration
1545.36

## Sheet: dataset_evaluator_parameters
section	name	map	confidence_interval_width	acceptable_ci_width	parameter	value
score_parameters	accuracy	<function mean at 0x102e968e0>	0.95
score_parameters	f1	<function mean at 0x102e968e0>	0.95
score_parameters	precision	<function mean at 0x102e968e0>	0.95
score_parameters	recall	<function mean at 0x102e968e0>	0.95
global_parameters					min_runs	10
global_parameters					max_runs	9.22337e+18

## Sheet: scores
name	value	confidence_interval_width
accuracy	0.397	0.0607541
f1	0.537896	0.0553353
precision	0.556712	0.0574324
recall	0.559486	0.0566039

## Sheet: mean
execution_type	cache_type	request_tokens	response_tokens	total_tokens	request_cost	response_cost	total_cost	execution_duration	execution_cost
sequential	no_cache	11338.2	523.243	11861.5	0.00453529	0.000837189	0.00537247	12.7583	7.607
sequential	with_process_cache	11338.2	523.243	11861.5	0.00453529	0.000837189	0.00537247	12.7583	7.607
sequential	with_persistent_cache	11338.2	523.243	11861.5	0.00453529	0.000837189	0.00537247	12.7583	7.607
parallel	no_cache	11338.2	523.243	11861.5	0.00453529	0.000837189	0.00537247	6.77688	3.275
parallel	with_process_cache	11338.2	523.243	11861.5	0.00453529	0.000837189	0.00537247	6.77688	3.275
parallel	with_persistent_cache	11338.2	523.243	11861.5	0.00453529	0.000837189	0.00537247	6.77688	3.275

## Sheet: sum
execution_type	cache_type	request_tokens	response_tokens	total_tokens	request_cost	response_cost	total_cost	execution_duration	execution_cost
sequential	no_cache	11338214	523243	11861457	4.53529	0.837189	5.37247	12758.3	7607
sequential	with_process_cache	11338214	523243	11861457	4.53529	0.837189	5.37247	12758.3	7607
sequential	with_persistent_cache	11338214	523243	11861457	4.53529	0.837189	5.37247	12758.3	7607
parallel	no_cache	11338214	523243	11861457	4.53529	0.837189	5.37247	6776.88	3275
parallel	with_process_cache	11338214	523243	11861457	4.53529	0.837189	5.37247	6776.88	3275
parallel	with_persistent_cache	11338214	523243	11861457	4.53529	0.837189	5.37247	6776.88	3275
