# Supplementary material
Source: ML conference proceedings conference paper supplement (https://openreview.net/forum?id=UZlJY3uV6P)
Supplement: supplementary_material [file dataset_measurement.xlsx]

## Sheet: global_evaluation_measurements
total_execution_duration
357.044

## Sheet: dataset_evaluator_parameters
section	name	map	confidence_interval_width	acceptable_ci_width	parameter	value
score_parameters	mistakes	<function mean at 0x100e687c0>	0.95
global_parameters					min_runs	10
global_parameters					max_runs	9.22337e+18

## Sheet: scores
name	value	confidence_interval_width
mistakes	11.28	1.49741

## Sheet: mean
execution_type	cache_type	request_tokens	response_tokens	total_tokens	request_cost	response_cost	total_cost	execution_duration	execution_cost
sequential	no_cache	46305.7	18457.1	64762.9	0.0231529	0.0276857	0.0508386	232.23	116
sequential	with_process_cache	46305.7	18457.1	64762.9	0.0231529	0.0276857	0.0508386	232.23	116
sequential	with_persistent_cache	46305.7	18457.1	64762.9	0.0231529	0.0276857	0.0508386	232.23	116
parallel	no_cache	46305.7	18457.1	64762.9	0.0231529	0.0276857	0.0508386	27.2245	7
parallel	with_process_cache	46305.7	18457.1	64762.9	0.0231529	0.0276857	0.0508386	27.2245	7
parallel	with_persistent_cache	46305.7	18457.1	64762.9	0.0231529	0.0276857	0.0508386	27.2245	7

## Sheet: sum
execution_type	cache_type	request_tokens	response_tokens	total_tokens	request_cost	response_cost	total_cost	execution_duration	execution_cost
sequential	no_cache	2315286	922857	3238143	1.15764	1.38429	2.54193	11611.5	5800
sequential	with_process_cache	2315286	922857	3238143	1.15764	1.38429	2.54193	11611.5	5800
sequential	with_persistent_cache	2315286	922857	3238143	1.15764	1.38429	2.54193	11611.5	5800
parallel	no_cache	2315286	922857	3238143	1.15764	1.38429	2.54193	1361.22	350
parallel	with_process_cache	2315286	922857	3238143	1.15764	1.38429	2.54193	1361.22	350
parallel	with_persistent_cache	2315286	922857	3238143	1.15764	1.38429	2.54193	1361.22	350
