# Supplementary material
Source: ML conference proceedings conference paper supplement (https://openreview.net/forum?id=UZlJY3uV6P)
Supplement: supplementary_material [file dataset_measurement.xlsx]

## Sheet: global_evaluation_measurements
total_execution_duration
101.915

## Sheet: dataset_evaluator_parameters
section	name	map	confidence_interval_width	acceptable_ci_width	parameter	value
score_parameters	mistakes	<function mean at 0x104ea87c0>	0.95
global_parameters					min_runs	10
global_parameters					max_runs	9.22337e+18

## Sheet: scores
name	value	confidence_interval_width
mistakes	12.12	1.50005

## Sheet: mean
execution_type	cache_type	request_tokens	response_tokens	total_tokens	request_cost	response_cost	total_cost	execution_duration	execution_cost
sequential	no_cache	47923	16584.7	64507.8	0.0239615	0.0248771	0.0488386	238.655	110
sequential	with_process_cache	47923	16584.7	64507.8	0.0239615	0.0248771	0.0488386	238.655	110
sequential	with_persistent_cache	47923	16584.7	64507.8	0.0239615	0.0248771	0.0488386	238.655	110
parallel	no_cache	47923	16584.7	64507.8	0.0239615	0.0248771	0.0488386	28.9854	7
parallel	with_process_cache	47923	16584.7	64507.8	0.0239615	0.0248771	0.0488386	28.9854	7
parallel	with_persistent_cache	47923	16584.7	64507.8	0.0239615	0.0248771	0.0488386	28.9854	7

## Sheet: sum
execution_type	cache_type	request_tokens	response_tokens	total_tokens	request_cost	response_cost	total_cost	execution_duration	execution_cost
sequential	no_cache	2396152	829236	3225388	1.19808	1.24385	2.44193	11932.8	5500
sequential	with_process_cache	2396152	829236	3225388	1.19808	1.24385	2.44193	11932.8	5500
sequential	with_persistent_cache	2396152	829236	3225388	1.19808	1.24385	2.44193	11932.8	5500
parallel	no_cache	2396152	829236	3225388	1.19808	1.24385	2.44193	1449.27	350
parallel	with_process_cache	2396152	829236	3225388	1.19808	1.24385	2.44193	1449.27	350
parallel	with_persistent_cache	2396152	829236	3225388	1.19808	1.24385	2.44193	1449.27	350
