# Supplementary material
Source: ML conference proceedings conference paper supplement (https://openreview.net/forum?id=UZlJY3uV6P)
Supplement: supplementary_material [file dataset_measurement.xlsx]

## Sheet: global_evaluation_measurements
total_execution_duration
23.7851

## Sheet: dataset_evaluator_parameters
section	name	map	confidence_interval_width	acceptable_ci_width	parameter	value
score_parameters	mistakes	<function mean at 0x104a64040>	0.95
global_parameters					min_runs	10
global_parameters					max_runs	9.22337e+18

## Sheet: scores
name	value	confidence_interval_width
mistakes	18.36	2.70713

## Sheet: mean
execution_type	cache_type	request_tokens	response_tokens	total_tokens	request_cost	response_cost	total_cost	execution_duration	execution_cost
sequential	no_cache	189628	42590.4	232219	0.0948142	0.0638856	0.1587	451.697	100
sequential	with_process_cache	189628	42590.4	232219	0.0948142	0.0638856	0.1587	451.697	100
sequential	with_persistent_cache	189628	42590.4	232219	0.0948142	0.0638856	0.1587	451.697	100
parallel	no_cache	189628	42590.4	232219	0.0948142	0.0638856	0.1587	39.0081	5
parallel	with_process_cache	189628	42590.4	232219	0.0948142	0.0638856	0.1587	39.0081	5
parallel	with_persistent_cache	189628	42590.4	232219	0.0948142	0.0638856	0.1587	39.0081	5

## Sheet: sum
execution_type	cache_type	request_tokens	response_tokens	total_tokens	request_cost	response_cost	total_cost	execution_duration	execution_cost
sequential	no_cache	9481420	2129520	11610940	4.74071	3.19428	7.93499	22584.9	5000
sequential	with_process_cache	9481420	2129520	11610940	4.74071	3.19428	7.93499	22584.9	5000
sequential	with_persistent_cache	9481420	2129520	11610940	4.74071	3.19428	7.93499	22584.9	5000
parallel	no_cache	9481420	2129520	11610940	4.74071	3.19428	7.93499	1950.41	250
parallel	with_process_cache	9481420	2129520	11610940	4.74071	3.19428	7.93499	1950.41	250
parallel	with_persistent_cache	9481420	2129520	11610940	4.74071	3.19428	7.93499	1950.41	250
