# Supplementary material
Source: ML conference proceedings conference paper supplement (https://openreview.net/forum?id=UZlJY3uV6P)
Supplement: supplementary_material [file dataset_measurement.xlsx]

## Sheet: global_evaluation_measurements
total_execution_duration
404.684

## Sheet: dataset_evaluator_parameters
section	name	map	confidence_interval_width	acceptable_ci_width	parameter	value
score_parameters	redundancy	<function mean at 0x106aa9f80>	0.95
score_parameters	retention	<function mean at 0x106aa9f80>	0.95
score_parameters	f1_score	<function mean at 0x106aa9f80>	0.95	0.05
global_parameters					min_runs	10
global_parameters					max_runs	9.22337e+18

## Sheet: scores
name	value	confidence_interval_width
redundancy	7.98	0.080383
retention	9.62	0.41228
f1_score	8.71153	0.205741

## Sheet: mean
execution_type	cache_type	request_tokens	response_tokens	total_tokens	request_cost	response_cost	total_cost	execution_duration	execution_cost
sequential	no_cache	92980.7	17364.1	110345	0.0464904	0.0260462	0.0725365	150.991	38
sequential	with_process_cache	78641.8	17243.6	95885.4	0.0393209	0.0258653	0.0651863	147.114	32
sequential	with_persistent_cache	75822.1	17219.9	93042	0.037911	0.0258298	0.0637409	146.382	30.82
parallel	no_cache	92980.7	17364.1	110345	0.0464904	0.0260462	0.0725365	33.3143	6
parallel	with_process_cache	78641.8	17243.6	95885.4	0.0393209	0.0258653	0.0651863	32.845	5.92
parallel	with_persistent_cache	75822.1	17219.9	93042	0.037911	0.0258298	0.0637409	32.7177	5.84

## Sheet: sum
execution_type	cache_type	request_tokens	response_tokens	total_tokens	request_cost	response_cost	total_cost	execution_duration	execution_cost
sequential	no_cache	4649036	868206	5517242	2.32452	1.30231	3.62683	7549.54	1900
sequential	with_process_cache	3932092	862178	4794270	1.96605	1.29327	3.25931	7355.72	1600
sequential	with_persistent_cache	3791104	860994	4652098	1.89555	1.29149	3.18704	7319.12	1541
parallel	no_cache	4649036	868206	5517242	2.32452	1.30231	3.62683	1665.72	300
parallel	with_process_cache	3932092	862178	4794270	1.96605	1.29327	3.25931	1642.25	296
parallel	with_persistent_cache	3791104	860994	4652098	1.89555	1.29149	3.18704	1635.88	292
