# Supplementary material
Source: ML conference proceedings conference paper supplement (https://openreview.net/forum?id=UZlJY3uV6P)
Supplement: supplementary_material [file dataset_measurement.xlsx]

## Sheet: global_evaluation_measurements
total_execution_duration
69.79

## Sheet: dataset_evaluator_parameters
section	name	map	confidence_interval_width	acceptable_ci_width	parameter	value
score_parameters	mistakes	<function mean at 0x103664040>	0.95
global_parameters					min_runs	10
global_parameters					max_runs	9.22337e+18

## Sheet: scores
name	value	confidence_interval_width
mistakes	13.34	1.81425

## Sheet: mean
execution_type	cache_type	request_tokens	response_tokens	total_tokens	request_cost	response_cost	total_cost	execution_duration	execution_cost
sequential	no_cache	34373.5	10540.8	44914.4	0.0171868	0.0158113	0.032998	165.768	74
sequential	with_process_cache	34373.5	10540.8	44914.4	0.0171868	0.0158113	0.032998	165.768	74
sequential	with_persistent_cache	34373.5	10540.8	44914.4	0.0171868	0.0158113	0.032998	165.768	74
parallel	no_cache	34373.5	10540.8	44914.4	0.0171868	0.0158113	0.032998	26.45	6
parallel	with_process_cache	34373.5	10540.8	44914.4	0.0171868	0.0158113	0.032998	26.45	6
parallel	with_persistent_cache	34373.5	10540.8	44914.4	0.0171868	0.0158113	0.032998	26.45	6

## Sheet: sum
execution_type	cache_type	request_tokens	response_tokens	total_tokens	request_cost	response_cost	total_cost	execution_duration	execution_cost
sequential	no_cache	1718677	527042	2245719	0.859339	0.790563	1.6499	8288.41	3700
sequential	with_process_cache	1718677	527042	2245719	0.859339	0.790563	1.6499	8288.41	3700
sequential	with_persistent_cache	1718677	527042	2245719	0.859339	0.790563	1.6499	8288.41	3700
parallel	no_cache	1718677	527042	2245719	0.859339	0.790563	1.6499	1322.5	300
parallel	with_process_cache	1718677	527042	2245719	0.859339	0.790563	1.6499	1322.5	300
parallel	with_persistent_cache	1718677	527042	2245719	0.859339	0.790563	1.6499	1322.5	300
