# Supplementary material
Source: ML conference proceedings conference paper supplement (https://openreview.net/forum?id=UZlJY3uV6P)
Supplement: supplementary_material [file dataset_measurement.xlsx]

## Sheet: global_evaluation_measurements
total_execution_duration
182.157

## Sheet: dataset_evaluator_parameters
section	name	map	confidence_interval_width	acceptable_ci_width	parameter	value
score_parameters	redundancy	<function mean at 0x1056bd940>	0.95
score_parameters	retention	<function mean at 0x1056bd940>	0.95
score_parameters	f1_score	<function mean at 0x1056bd940>	0.95
global_parameters					min_runs	10
global_parameters					max_runs	9.22337e+18

## Sheet: scores
name	value	confidence_interval_width
redundancy	8	0
retention	9.74	0.394631
f1_score	8.77239	0.182144

## Sheet: mean
execution_type	cache_type	request_tokens	response_tokens	total_tokens	request_cost	response_cost	total_cost	execution_duration	execution_cost
sequential	no_cache	86893.3	10687.8	97581.2	0.0434467	0.0160318	0.0594784	101.348	38
sequential	with_process_cache	83459	10657.8	94116.9	0.0417295	0.0159868	0.0577163	100.277	36.5
sequential	with_persistent_cache	83459	10657.8	94116.9	0.0417295	0.0159868	0.0577163	100.277	36.5
parallel	no_cache	86893.3	10687.8	97581.2	0.0434467	0.0160318	0.0594784	27.0166	6
parallel	with_process_cache	83459	10657.8	94116.9	0.0417295	0.0159868	0.0577163	26.8135	5.96
parallel	with_persistent_cache	83459	10657.8	94116.9	0.0417295	0.0159868	0.0577163	26.8135	5.96

## Sheet: sum
execution_type	cache_type	request_tokens	response_tokens	total_tokens	request_cost	response_cost	total_cost	execution_duration	execution_cost
sequential	no_cache	4344667	534392	4879059	2.17233	0.801588	2.97392	5067.38	1900
sequential	with_process_cache	4172951	532892	4705843	2.08648	0.799338	2.88581	5013.84	1825
sequential	with_persistent_cache	4172951	532892	4705843	2.08648	0.799338	2.88581	5013.84	1825
parallel	no_cache	4344667	534392	4879059	2.17233	0.801588	2.97392	1350.83	300
parallel	with_process_cache	4172951	532892	4705843	2.08648	0.799338	2.88581	1340.68	298
parallel	with_persistent_cache	4172951	532892	4705843	2.08648	0.799338	2.88581	1340.68	298
