# Supplementary material
Source: ML conference proceedings conference paper supplement (https://openreview.net/forum?id=UZlJY3uV6P)
Supplement: supplementary_material [file dataset_measurement.xlsx]

## Sheet: global_evaluation_measurements
total_execution_duration
939.946

## Sheet: dataset_evaluator_parameters
section	name	map	confidence_interval_width	acceptable_ci_width	parameter	value
score_parameters	mistakes	<function mean at 0x1045dd4e0>	0.95
global_parameters					min_runs	10
global_parameters					max_runs	9.22337e+18

## Sheet: scores
name	value	confidence_interval_width
mistakes	12.68	1.83532

## Sheet: mean
execution_type	cache_type	request_tokens	response_tokens	total_tokens	request_cost	response_cost	total_cost	execution_duration	execution_cost
sequential	no_cache	57572.4	13988.8	71561.2	0.0287862	0.0209832	0.0497694	258.606	112
sequential	with_process_cache	57572.4	13988.8	71561.2	0.0287862	0.0209832	0.0497694	258.606	112
sequential	with_persistent_cache	57572.4	13988.8	71561.2	0.0287862	0.0209832	0.0497694	258.606	112
parallel	no_cache	57572.4	13988.8	71561.2	0.0287862	0.0209832	0.0497694	30.4677	6
parallel	with_process_cache	57572.4	13988.8	71561.2	0.0287862	0.0209832	0.0497694	30.4677	6
parallel	with_persistent_cache	57572.4	13988.8	71561.2	0.0287862	0.0209832	0.0497694	30.4677	6

## Sheet: sum
execution_type	cache_type	request_tokens	response_tokens	total_tokens	request_cost	response_cost	total_cost	execution_duration	execution_cost
sequential	no_cache	2878621	699440	3578061	1.43931	1.04916	2.48847	12930.3	5600
sequential	with_process_cache	2878621	699440	3578061	1.43931	1.04916	2.48847	12930.3	5600
sequential	with_persistent_cache	2878621	699440	3578061	1.43931	1.04916	2.48847	12930.3	5600
parallel	no_cache	2878621	699440	3578061	1.43931	1.04916	2.48847	1523.39	300
parallel	with_process_cache	2878621	699440	3578061	1.43931	1.04916	2.48847	1523.39	300
parallel	with_persistent_cache	2878621	699440	3578061	1.43931	1.04916	2.48847	1523.39	300
