# Supplementary material
Source: ML conference proceedings conference paper supplement (https://openreview.net/forum?id=UZlJY3uV6P)
Supplement: supplementary_material [file dataset_measurement.xlsx]

## Sheet: global_evaluation_measurements
total_execution_duration
50.002

## Sheet: dataset_evaluator_parameters
section	name	map	confidence_interval_width	acceptable_ci_width	parameter	value
score_parameters	mistakes	<function mean at 0x106b54040>	0.95
global_parameters					min_runs	10
global_parameters					max_runs	9.22337e+18

## Sheet: scores
name	value	confidence_interval_width
mistakes	12.36	1.8472

## Sheet: mean
execution_type	cache_type	request_tokens	response_tokens	total_tokens	request_cost	response_cost	total_cost	execution_duration	execution_cost
sequential	no_cache	57568	14031	71599.1	0.028784	0.0210466	0.0498306	166.76	112
sequential	with_process_cache	57568	14031	71599.1	0.028784	0.0210466	0.0498306	166.76	112
sequential	with_persistent_cache	57568	14031	71599.1	0.028784	0.0210466	0.0498306	166.76	112
parallel	no_cache	57568	14031	71599.1	0.028784	0.0210466	0.0498306	24.9689	6
parallel	with_process_cache	57568	14031	71599.1	0.028784	0.0210466	0.0498306	24.9689	6
parallel	with_persistent_cache	57568	14031	71599.1	0.028784	0.0210466	0.0498306	24.9689	6

## Sheet: sum
execution_type	cache_type	request_tokens	response_tokens	total_tokens	request_cost	response_cost	total_cost	execution_duration	execution_cost
sequential	no_cache	2878402	701552	3579954	1.4392	1.05233	2.49153	8338.01	5600
sequential	with_process_cache	2878402	701552	3579954	1.4392	1.05233	2.49153	8338.01	5600
sequential	with_persistent_cache	2878402	701552	3579954	1.4392	1.05233	2.49153	8338.01	5600
parallel	no_cache	2878402	701552	3579954	1.4392	1.05233	2.49153	1248.44	300
parallel	with_process_cache	2878402	701552	3579954	1.4392	1.05233	2.49153	1248.44	300
parallel	with_persistent_cache	2878402	701552	3579954	1.4392	1.05233	2.49153	1248.44	300
