# Supplementary material
Source: ML conference proceedings conference paper supplement (https://openreview.net/forum?id=UZlJY3uV6P)
Supplement: supplementary_material [file dataset_measurement.xlsx]

## Sheet: global_evaluation_measurements
total_execution_duration
761.122

## Sheet: dataset_evaluator_parameters
section	name	map	confidence_interval_width	acceptable_ci_width	parameter	value
score_parameters	redundancy	<function mean at 0x106291f80>	0.95
score_parameters	retention	<function mean at 0x106291f80>	0.95
score_parameters	f1_score	<function mean at 0x106291f80>	0.95	0.05
global_parameters					min_runs	10
global_parameters					max_runs	9.22337e+18

## Sheet: scores
name	value	confidence_interval_width
redundancy	7.98	0.080383
retention	9.02	0.644396
f1_score	8.43399	0.311326

## Sheet: mean
execution_type	cache_type	request_tokens	response_tokens	total_tokens	request_cost	response_cost	total_cost	execution_duration	execution_cost
sequential	no_cache	88783.9	16203.2	104987	0.044392	0.0243049	0.0686968	145.425	38
sequential	with_process_cache	73249.9	16070.8	89320.7	0.036625	0.0241063	0.0607312	141.219	31.38
sequential	with_persistent_cache	70601.8	16048	86649.8	0.0353009	0.0240721	0.059373	140.491	30.24
parallel	no_cache	88783.9	16203.2	104987	0.044392	0.0243049	0.0686968	31.536	6
parallel	with_process_cache	73249.9	16070.8	89320.7	0.036625	0.0241063	0.0607312	31.0904	5.96
parallel	with_persistent_cache	70601.8	16048	86649.8	0.0353009	0.0240721	0.059373	31.0028	5.9

## Sheet: sum
execution_type	cache_type	request_tokens	response_tokens	total_tokens	request_cost	response_cost	total_cost	execution_duration	execution_cost
sequential	no_cache	4439196	810162	5249358	2.2196	1.21524	3.43484	7271.24	1900
sequential	with_process_cache	3662495	803542	4466037	1.83125	1.20531	3.03656	7060.96	1569
sequential	with_persistent_cache	3530090	802402	4332492	1.76504	1.2036	2.96865	7024.55	1512
parallel	no_cache	4439196	810162	5249358	2.2196	1.21524	3.43484	1576.8	300
parallel	with_process_cache	3662495	803542	4466037	1.83125	1.20531	3.03656	1554.52	298
parallel	with_persistent_cache	3530090	802402	4332492	1.76504	1.2036	2.96865	1550.14	295
