# Supplementary material
Source: ML conference proceedings conference paper supplement (https://openreview.net/forum?id=UZlJY3uV6P)
Supplement: supplementary_material [file dataset_measurement.xlsx]

## Sheet: global_evaluation_measurements
total_execution_duration
249.091

## Sheet: dataset_evaluator_parameters
section	name	map	confidence_interval_width	acceptable_ci_width	parameter	value
score_parameters	success	<function mean at 0x1028cc0e0>	0.95
global_parameters					min_runs	10
global_parameters					max_runs	9.22337e+18

## Sheet: scores
name	value	confidence_interval_width
success	0.66	0.188935

## Sheet: mean
execution_type	cache_type	request_tokens	response_tokens	total_tokens	request_cost	response_cost	total_cost	execution_duration	execution_cost
sequential	no_cache	68304.2	8094.95	76399.2	0.170761	0.0809495	0.25171	451.668	193.36
sequential	with_process_cache	54965.6	6344.98	61310.6	0.137414	0.0634498	0.200864	346.439	157.6
sequential	with_persistent_cache	35291.8	3485.22	38777	0.0882295	0.0348522	0.123082	195.015	104.37
parallel	no_cache	68304.2	8094.95	76399.2	0.170761	0.0809495	0.25171	26.6654	6
parallel	with_process_cache	54965.6	6344.98	61310.6	0.137414	0.0634498	0.200864	26.0785	6
parallel	with_persistent_cache	35291.8	3485.22	38777	0.0882295	0.0348522	0.123082	21.1223	5.49

## Sheet: sum
execution_type	cache_type	request_tokens	response_tokens	total_tokens	request_cost	response_cost	total_cost	execution_duration	execution_cost
sequential	no_cache	6830425	809495	7639920	17.0761	8.09495	25.171	45166.8	19336
sequential	with_process_cache	5496563	634498	6131061	13.7414	6.34498	20.0864	34643.9	15760
sequential	with_persistent_cache	3529178	348522	3877700	8.82295	3.48522	12.3082	19501.5	10437
parallel	no_cache	6830425	809495	7639920	17.0761	8.09495	25.171	2666.54	600
parallel	with_process_cache	5496563	634498	6131061	13.7414	6.34498	20.0864	2607.85	600
parallel	with_persistent_cache	3529178	348522	3877700	8.82295	3.48522	12.3082	2112.23	549
