# Supplementary material
Source: ML conference proceedings conference paper supplement (https://openreview.net/forum?id=UZlJY3uV6P)
Supplement: supplementary_material [file dataset_measurement.xlsx]

## Sheet: global_evaluation_measurements
total_execution_duration
261.024

## Sheet: dataset_evaluator_parameters
section	name	map	confidence_interval_width	acceptable_ci_width	parameter	value
score_parameters	success	<function mean at 0x102bfc0e0>	0.95
global_parameters					min_runs	10
global_parameters					max_runs	9.22337e+18

## Sheet: scores
name	value	confidence_interval_width
success	0.61	0.136363

## Sheet: mean
execution_type	cache_type	request_tokens	response_tokens	total_tokens	request_cost	response_cost	total_cost	execution_duration	execution_cost
sequential	no_cache	87664.8	8319.1	95983.9	0.219162	0.083191	0.302353	564.783	254.12
sequential	with_process_cache	60077.3	5417.28	65494.5	0.150193	0.0541728	0.204366	389.033	176.835
sequential	with_persistent_cache	37804.3	2106.68	39911	0.0945108	0.0210668	0.115578	258.729	115.94
parallel	no_cache	87664.8	8319.1	95983.9	0.219162	0.083191	0.302353	27.9905	6
parallel	with_process_cache	60077.3	5417.28	65494.5	0.150193	0.0541728	0.204366	26.8656	5.98
parallel	with_persistent_cache	37804.3	2106.68	39911	0.0945108	0.0210668	0.115578	22.3163	5.195

## Sheet: sum
execution_type	cache_type	request_tokens	response_tokens	total_tokens	request_cost	response_cost	total_cost	execution_duration	execution_cost
sequential	no_cache	17532960	1663820	19196780	43.8324	16.6382	60.4706	112957	50824
sequential	with_process_cache	12015453	1083456	13098909	30.0386	10.8346	40.8732	77806.6	35367
sequential	with_persistent_cache	7560864	421337	7982201	18.9022	4.21337	23.1155	51745.8	23188
parallel	no_cache	17532960	1663820	19196780	43.8324	16.6382	60.4706	5598.09	1200
parallel	with_process_cache	12015453	1083456	13098909	30.0386	10.8346	40.8732	5373.12	1196
parallel	with_persistent_cache	7560864	421337	7982201	18.9022	4.21337	23.1155	4463.26	1039
