# Supplementary material
Source: ML conference proceedings conference paper supplement (https://openreview.net/forum?id=UZlJY3uV6P)
Supplement: supplementary_material [file dataset_measurement.xlsx]

## Sheet: global_evaluation_measurements
total_execution_duration
315.554

## Sheet: dataset_evaluator_parameters
section	name	map	confidence_interval_width	acceptable_ci_width	parameter	value
score_parameters	mistakes	<function mean at 0x102addd00>	0.95
global_parameters					min_runs	10
global_parameters					max_runs	9.22337e+18

## Sheet: scores
name	value	confidence_interval_width
mistakes	24.46	4.02769

## Sheet: mean
execution_type	cache_type	request_tokens	response_tokens	total_tokens	request_cost	response_cost	total_cost	execution_duration	execution_cost
sequential	no_cache	69754.6	15594.8	85349.3	0.0348773	0.0233922	0.0582695	146.31	36
sequential	with_process_cache	69754.6	15594.8	85349.3	0.0348773	0.0233922	0.0582695	146.31	36
sequential	with_persistent_cache	69754.6	15594.8	85349.3	0.0348773	0.0233922	0.0582695	146.31	36
parallel	no_cache	69754.6	15594.8	85349.3	0.0348773	0.0233922	0.0582695	34.4326	6
parallel	with_process_cache	69754.6	15594.8	85349.3	0.0348773	0.0233922	0.0582695	34.4326	6
parallel	with_persistent_cache	69754.6	15594.8	85349.3	0.0348773	0.0233922	0.0582695	34.4326	6

## Sheet: sum
execution_type	cache_type	request_tokens	response_tokens	total_tokens	request_cost	response_cost	total_cost	execution_duration	execution_cost
sequential	no_cache	3487728	779739	4267467	1.74386	1.16961	2.91347	7315.51	1800
sequential	with_process_cache	3487728	779739	4267467	1.74386	1.16961	2.91347	7315.51	1800
sequential	with_persistent_cache	3487728	779739	4267467	1.74386	1.16961	2.91347	7315.51	1800
parallel	no_cache	3487728	779739	4267467	1.74386	1.16961	2.91347	1721.63	300
parallel	with_process_cache	3487728	779739	4267467	1.74386	1.16961	2.91347	1721.63	300
parallel	with_persistent_cache	3487728	779739	4267467	1.74386	1.16961	2.91347	1721.63	300
