# Supplementary material
Source: ML conference proceedings conference paper supplement (https://openreview.net/forum?id=UZlJY3uV6P)
Supplement: supplementary_material [file dataset_measurement.xlsx]

## Sheet: global_evaluation_measurements
total_execution_duration
1076.49

## Sheet: dataset_evaluator_parameters
section	name	map	confidence_interval_width	acceptable_ci_width	parameter	value
score_parameters	accuracy	<function mean at 0x103267a60>	0.95
score_parameters	f1	<function mean at 0x103267a60>	0.95
score_parameters	precision	<function mean at 0x103267a60>	0.95
score_parameters	recall	<function mean at 0x103267a60>	0.95
global_parameters					min_runs	10
global_parameters					max_runs	9.22337e+18

## Sheet: scores
name	value	confidence_interval_width
accuracy	0.151	0.0444595
f1	0.246976	0.0469134
precision	0.258858	0.049713
recall	0.262533	0.0488444

## Sheet: mean
execution_type	cache_type	request_tokens	response_tokens	total_tokens	request_cost	response_cost	total_cost	execution_duration	execution_cost
sequential	no_cache	16966.7	873.61	17840.3	0.00678667	0.00139778	0.00818444	21.6498	10.565
sequential	with_process_cache	16925.4	871.447	17796.9	0.00677018	0.00139432	0.00816449	21.5896	10.534
sequential	with_persistent_cache	14264	754.973	15019	0.00570562	0.00120796	0.00691357	18.3646	8.927
parallel	no_cache	16966.7	873.61	17840.3	0.00678667	0.00139778	0.00818444	10.3943	4.398
parallel	with_process_cache	16925.4	871.447	17796.9	0.00677018	0.00139432	0.00816449	10.3842	4.394
parallel	with_persistent_cache	14264	754.973	15019	0.00570562	0.00120796	0.00691357	8.93067	3.801

## Sheet: sum
execution_type	cache_type	request_tokens	response_tokens	total_tokens	request_cost	response_cost	total_cost	execution_duration	execution_cost
sequential	no_cache	16966668	873610	17840278	6.78667	1.39778	8.18444	21649.8	10565
sequential	with_process_cache	16925444	871447	17796891	6.77018	1.39432	8.16449	21589.6	10534
sequential	with_persistent_cache	14264039	754973	15019012	5.70562	1.20796	6.91357	18364.6	8927
parallel	no_cache	16966668	873610	17840278	6.78667	1.39778	8.18444	10394.3	4398
parallel	with_process_cache	16925444	871447	17796891	6.77018	1.39432	8.16449	10384.2	4394
parallel	with_persistent_cache	14264039	754973	15019012	5.70562	1.20796	6.91357	8930.67	3801
