# Supplementary material
Source: ML conference proceedings conference paper supplement (https://openreview.net/forum?id=UZlJY3uV6P)
Supplement: supplementary_material [file dspy_study_measurement.xlsx]

## Sheet: mean_total_measurements
execution_type	cache_type	request_tokens	response_tokens	total_tokens	request_cost	response_cost	total_cost	execution_duration	execution_cost
sequential	no_cache	55843.3	8981.89	64825.1	0.0279216	0.0134728	0.0413945	95.9569	24
sequential	with_process_cache	52446.8	8953.91	61400.7	0.0262234	0.0134309	0.0396543	95.1063	22.6017
sequential	with_persistent_cache	22616.8	2501.37	25118.2	0.0113084	0.00375206	0.0150605	40.959	10.0546
parallel	no_cache	55843.3	8981.89	64825.1	0.0279216	0.0134728	0.0413945	30.6183	6
parallel	with_process_cache	52446.8	8953.91	61400.7	0.0262234	0.0134309	0.0396543	30.4078	5.94
parallel	with_persistent_cache	22616.8	2501.37	25118.2	0.0113084	0.00375206	0.0150605	11.0182	2.08208

## Sheet: sum_total_measurements
execution_type	cache_type	request_tokens	response_tokens	total_tokens	request_cost	response_cost	total_cost	execution_duration	execution_cost
sequential	no_cache	134023805	21556541	155580346	67.0119	32.3348	99.3467	230297	57600
sequential	with_process_cache	125872380	21489377	147361757	62.9362	32.2341	95.1703	228255	54244
sequential	with_persistent_cache	54280383	6003289	60283672	27.1402	9.00493	36.1451	98301.7	24131
parallel	no_cache	134023805	21556541	155580346	67.0119	32.3348	99.3467	73483.8	14400
parallel	with_process_cache	125872380	21489377	147361757	62.9362	32.2341	95.1703	72978.7	14256
parallel	with_persistent_cache	54280383	6003289	60283672	27.1402	9.00493	36.1451	26443.6	4997
