# Supplementary material
Source: ML conference proceedings conference paper supplement (https://openreview.net/forum?id=UZlJY3uV6P)
Supplement: supplementary_material [file game_of_24_study.xlsx]

## Sheet: mean_total_measurements
execution_type	cache_type	request_tokens	response_tokens	total_tokens	request_cost	response_cost	total_cost	execution_duration	execution_cost
sequential	no_cache	65368.1	7204.28	72572.4	0.16342	0.0720428	0.235463	456.876	186.781
sequential	with_process_cache	49020.5	5391.27	54411.7	0.122551	0.0539127	0.176464	352.798	141.477
sequential	with_persistent_cache	9970.83	460.351	10431.2	0.0249271	0.00460351	0.0295306	107.235	31.3135
parallel	no_cache	65368.1	7204.28	72572.4	0.16342	0.0720428	0.235463	30.0306	5.99192
parallel	with_process_cache	49020.5	5391.27	54411.7	0.122551	0.0539127	0.176464	29.4002	5.96115
parallel	with_persistent_cache	9970.83	460.351	10431.2	0.0249271	0.00460351	0.0295306	9.09474	2.03404

## Sheet: sum_total_measurements
execution_type	cache_type	request_tokens	response_tokens	total_tokens	request_cost	response_cost	total_cost	execution_duration	execution_cost
sequential	no_cache	339914178	37462246	377376424	849.785	374.622	1224.41	2.37576e+06	971260
sequential	with_process_cache	254906408	28034627	282941035	637.266	280.346	917.612	1.83455e+06	735681
sequential	with_persistent_cache	51848315	2393827	54242142	129.621	23.9383	153.559	557621	162830
parallel	no_cache	339914178	37462246	377376424	849.785	374.622	1224.41	156159	31158
parallel	with_process_cache	254906408	28034627	282941035	637.266	280.346	917.612	152881	30998
parallel	with_persistent_cache	51848315	2393827	54242142	129.621	23.9383	153.559	47292.6	10577
