# Supplementary material
Source: ML conference proceedings conference paper supplement (https://openreview.net/forum?id=UZlJY3uV6P)
Supplement: supplementary_material [file game_of_24_study_best_run.xlsx]

## Sheet: global_evaluation_measurements
total_execution_duration
186.383

## Sheet: dataset_evaluator_parameters
section	name	map	confidence_interval_width	acceptable_ci_width	parameter	value
score_parameters	success	<function mean at 0x10610bb00>	0.95
score_parameters	cost	<function mean at 0x10610bb00>	0.95
global_parameters					min_runs	10
global_parameters					max_runs	9.22337e+18

## Sheet: scores
name	value	confidence_interval_width
success	0.665	0.131957
cost	0.186381	0.00804912

## Sheet: mean
execution_type	cache_type	request_tokens	response_tokens	total_tokens	request_cost	response_cost	total_cost	execution_duration	execution_cost
sequential	no_cache	69708.3	8200.75	77909	0.174271	0.0820076	0.256278	432.051	197.495
sequential	with_process_cache	50426.7	6031.43	56458.1	0.126067	0.0603143	0.186381	317.866	144.28
sequential	with_persistent_cache	5360.6	142.555	5503.15	0.0134015	0.00142555	0.014827	49.0089	16.915
parallel	no_cache	69708.3	8200.75	77909	0.174271	0.0820076	0.256278	32.3986	5.995
parallel	with_process_cache	50426.7	6031.43	56458.1	0.126067	0.0603143	0.186381	31.8469	5.965
parallel	with_persistent_cache	5360.6	142.555	5503.15	0.0134015	0.00142555	0.014827	7.67726	1.55

## Sheet: sum
execution_type	cache_type	request_tokens	response_tokens	total_tokens	request_cost	response_cost	total_cost	execution_duration	execution_cost
sequential	no_cache	13941658	1640151	15581809	34.8541	16.4015	51.2557	86410.3	39499
sequential	with_process_cache	10085338	1206285	11291623	25.2133	12.0629	37.2762	63573.1	28856
sequential	with_persistent_cache	1072119	28511	1100630	2.6803	0.28511	2.96541	9801.78	3383
parallel	no_cache	13941658	1640151	15581809	34.8541	16.4015	51.2557	6479.73	1199
parallel	with_process_cache	10085338	1206285	11291623	25.2133	12.0629	37.2762	6369.38	1193
parallel	with_persistent_cache	1072119	28511	1100630	2.6803	0.28511	2.96541	1535.45	310
