# Supplementary material
Source: ML conference proceedings conference paper supplement (https://openreview.net/forum?id=UZlJY3uV6P)
Supplement: supplementary_material [file got_sorting_study_best_run.xlsx]

## Sheet: global_evaluation_measurements
total_execution_duration
49.338

## Sheet: dataset_evaluator_parameters
section	name	map	confidence_interval_width	acceptable_ci_width	parameter	value
score_parameters	mistakes	<function mean at 0x104490040>	0.95
score_parameters	cost	<function mean at 0x104490040>	0.95
global_parameters					min_runs	10
global_parameters					max_runs	9.22337e+18

## Sheet: scores
name	value	confidence_interval_width
mistakes	11.66	1.71332
cost	0.0488596	0.000557916

## Sheet: mean
execution_type	cache_type	request_tokens	response_tokens	total_tokens	request_cost	response_cost	total_cost	execution_duration	execution_cost
sequential	no_cache	47907.8	16603.8	64511.6	0.0239539	0.0249057	0.0488596	183.043	110
sequential	with_process_cache	47907.8	16603.8	64511.6	0.0239539	0.0249057	0.0488596	183.043	110
sequential	with_persistent_cache	530.94	265.9	796.84	0.00026547	0.00039885	0.00066432	2.40582	0.76
parallel	no_cache	47907.8	16603.8	64511.6	0.0239539	0.0249057	0.0488596	27.0672	7
parallel	with_process_cache	47907.8	16603.8	64511.6	0.0239539	0.0249057	0.0488596	27.0672	7
parallel	with_persistent_cache	530.94	265.9	796.84	0.00026547	0.00039885	0.00066432	0.783355	0.2

## Sheet: sum
execution_type	cache_type	request_tokens	response_tokens	total_tokens	request_cost	response_cost	total_cost	execution_duration	execution_cost
sequential	no_cache	2395390	830189	3225579	1.1977	1.24528	2.44298	9152.14	5500
sequential	with_process_cache	2395390	830189	3225579	1.1977	1.24528	2.44298	9152.14	5500
sequential	with_persistent_cache	26547	13295	39842	0.0132735	0.0199425	0.033216	120.291	38
parallel	no_cache	2395390	830189	3225579	1.1977	1.24528	2.44298	1353.36	350
parallel	with_process_cache	2395390	830189	3225579	1.1977	1.24528	2.44298	1353.36	350
parallel	with_persistent_cache	26547	13295	39842	0.0132735	0.0199425	0.033216	39.1677	10
