# Supplementary material
Source: ML conference proceedings conference paper supplement (https://openreview.net/forum?id=UZlJY3uV6P)
Supplement: supplementary_material [file got_sorting_study_best_run.xlsx]

## Sheet: global_evaluation_measurements
total_execution_duration
36.5236

## Sheet: dataset_evaluator_parameters
section	name	map	confidence_interval_width	acceptable_ci_width	parameter	value
score_parameters	mistakes	<function mean at 0x1051fc860>	0.95
score_parameters	mistakes_penalized	<function mean at 0x1051fc860>	0.95
global_parameters					min_runs	10
global_parameters					max_runs	9.22337e+18

## Sheet: scores
name	value	confidence_interval_width
mistakes	11.48	1.81654
mistakes_penalized	11.5621	1.84385

## Sheet: mean
execution_type	cache_type	request_tokens	response_tokens	total_tokens	request_cost	response_cost	total_cost	execution_duration	execution_cost
sequential	no_cache	46276.9	18460.8	64737.7	0.0231384	0.0276912	0.0508296	204.388	116
sequential	with_process_cache	46276.9	18460.8	64737.7	0.0231384	0.0276912	0.0508296	204.388	116
sequential	with_persistent_cache	0	0	0	0	0	0	0	0
parallel	no_cache	46276.9	18460.8	64737.7	0.0231384	0.0276912	0.0508296	26.6923	7
parallel	with_process_cache	46276.9	18460.8	64737.7	0.0231384	0.0276912	0.0508296	26.6923	7
parallel	with_persistent_cache	0	0	0	0	0	0	0	0

## Sheet: sum
execution_type	cache_type	request_tokens	response_tokens	total_tokens	request_cost	response_cost	total_cost	execution_duration	execution_cost
sequential	no_cache	2313843	923040	3236883	1.15692	1.38456	2.54148	10219.4	5800
sequential	with_process_cache	2313843	923040	3236883	1.15692	1.38456	2.54148	10219.4	5800
sequential	with_persistent_cache	0	0	0	0	0	0	0	0
parallel	no_cache	2313843	923040	3236883	1.15692	1.38456	2.54148	1334.62	350
parallel	with_process_cache	2313843	923040	3236883	1.15692	1.38456	2.54148	1334.62	350
parallel	with_persistent_cache	0	0	0	0	0	0	0	0
