# Supplementary material
Source: ML conference proceedings conference paper supplement (https://openreview.net/forum?id=UZlJY3uV6P)
Supplement: supplementary_material [file got_sorting_study_measurement.xlsx]

## Sheet: mean_total_measurements
execution_type	cache_type	request_tokens	response_tokens	total_tokens	request_cost	response_cost	total_cost	execution_duration	execution_cost
sequential	no_cache	56088.6	17501.4	73590	0.0280443	0.0262521	0.0542964	200.91	122
sequential	with_process_cache	56088.6	17501.4	73590	0.0280443	0.0262521	0.0542964	200.91	122
sequential	with_persistent_cache	4756.89	1687.16	6444.05	0.00237845	0.00253074	0.00490918	19.7263	8.9732
parallel	no_cache	56088.6	17501.4	73590	0.0280443	0.0262521	0.0542964	28.6859	7.06
parallel	with_process_cache	56088.6	17501.4	73590	0.0280443	0.0262521	0.0542964	28.6859	7.06
parallel	with_persistent_cache	4756.89	1687.16	6444.05	0.00237845	0.00253074	0.00490918	4.7154	1.0112

## Sheet: sum_total_measurements
execution_type	cache_type	request_tokens	response_tokens	total_tokens	request_cost	response_cost	total_cost	execution_duration	execution_cost
sequential	no_cache	140221434	43753526	183974960	70.1107	65.6303	135.741	502274	305000
sequential	with_process_cache	140221434	43753526	183974960	70.1107	65.6303	135.741	502274	305000
sequential	with_persistent_cache	11892228	4217892	16110120	5.94611	6.32684	12.273	49315.7	22433
parallel	no_cache	140221434	43753526	183974960	70.1107	65.6303	135.741	71714.6	17650
parallel	with_process_cache	140221434	43753526	183974960	70.1107	65.6303	135.741	71714.6	17650
parallel	with_persistent_cache	11892228	4217892	16110120	5.94611	6.32684	12.273	11788.5	2528
