# Supplementary material
Source: ML conference proceedings conference paper supplement (https://openreview.net/forum?id=UZlJY3uV6P)
Supplement: supplementary_material [file got_sorting_study_measurement.xlsx]

## Sheet: mean_total_measurements
execution_type	cache_type	request_tokens	response_tokens	total_tokens	request_cost	response_cost	total_cost	execution_duration	execution_cost
sequential	no_cache	53074.4	16519.3	69593.7	0.0265372	0.0247789	0.0513161	185.626	114.28
sequential	with_process_cache	53074.4	16519.3	69593.7	0.0265372	0.0247789	0.0513161	185.626	114.28
sequential	with_persistent_cache	3542.08	1077.19	4619.28	0.00177104	0.00161579	0.00338683	11.9491	6.1484
parallel	no_cache	53074.4	16519.3	69593.7	0.0265372	0.0247789	0.0513161	27.3573	7.28
parallel	with_process_cache	53074.4	16519.3	69593.7	0.0265372	0.0247789	0.0513161	27.3573	7.28
parallel	with_persistent_cache	3542.08	1077.19	4619.28	0.00177104	0.00161579	0.00338683	3.12277	0.8352

## Sheet: sum_total_measurements
execution_type	cache_type	request_tokens	response_tokens	total_tokens	request_cost	response_cost	total_cost	execution_duration	execution_cost
sequential	no_cache	132686067	41298159	173984226	66.343	61.9472	128.29	464065	285700
sequential	with_process_cache	132686067	41298159	173984226	66.343	61.9472	128.29	464065	285700
sequential	with_persistent_cache	8855211	2692981	11548192	4.42761	4.03947	8.46708	29872.6	15371
parallel	no_cache	132686067	41298159	173984226	66.343	61.9472	128.29	68393.3	18200
parallel	with_process_cache	132686067	41298159	173984226	66.343	61.9472	128.29	68393.3	18200
parallel	with_persistent_cache	8855211	2692981	11548192	4.42761	4.03947	8.46708	7806.92	2088
