# Supplementary material
Source: ML conference proceedings conference paper supplement (https://openreview.net/forum?id=UZlJY3uV6P)
Supplement: supplementary_material [file test_dataset_measurement.xlsx]

## Sheet: global_evaluation_measurements
total_execution_duration
11.0047

## Sheet: dataset_evaluator_parameters
section	name	map	confidence_interval_width	acceptable_ci_width	parameter	value
score_parameters	accuracy	<function mean at 0x102302660>	0.95	0.05
global_parameters					min_runs	10
global_parameters					max_runs	500

## Sheet: scores
scores	name	value	confidence_interval_width
Score(name='accuracy', value=np.float64(0.714), confidence_interval_width=np.float64(0.07949038258680736))	accuracy	0.714	0.0794904

## Sheet: mean
execution_type	cache_type	request_tokens	response_tokens	total_tokens	request_cost	response_cost	total_cost	execution_duration	execution_cost
sequential	no_cache	160.01	14.288	174.298	4.8003	0.85728	5.65758	2.21334	5
sequential	with_process_cache	160.01	14.288	174.298	4.8003	0.85728	5.65758	2.21334	5
sequential	with_persistent_cache	0	0	0	0	0	0	0	0
parallel	no_cache	160.01	14.288	174.298	4.8003	0.85728	5.65758	0.685088	1
parallel	with_process_cache	160.01	14.288	174.298	4.8003	0.85728	5.65758	0.685088	1
parallel	with_persistent_cache	0	0	0	0	0	0	0	0
