# Supplementary material
Source: ML conference proceedings conference paper supplement (https://openreview.net/forum?id=UZlJY3uV6P)
Supplement: supplementary_material [file test_optimizer_best_run.xlsx]

## Sheet: global_evaluation_measurements
total_execution_duration
1.54514

## Sheet: dataset_evaluator_parameters
section	name	map	confidence_interval_width	acceptable_ci_width	parameter	value
score_parameters	accuracy	<function mean at 0x104d9a7a0>	0.95	0.05
global_parameters					min_runs	10
global_parameters					max_runs	50

## Sheet: scores
scores	name	value	confidence_interval_width
Score(name='accuracy', value=np.float64(0.66), confidence_interval_width=np.float64(0.27198669040042645))	accuracy	0.66	0.271987

## Sheet: mean
execution_type	cache_type	request_tokens	response_tokens	total_tokens	request_cost	response_cost	total_cost	execution_duration	execution_cost
sequential	no_cache	320	29.58	349.58	9.6	1.7748	11.3748	4.46224	10
sequential	with_process_cache	320	29.58	349.58	9.6	1.7748	11.3748	4.46224	10
sequential	with_persistent_cache	0	0	0	0	0	0	0	0
parallel	no_cache	320	29.58	349.58	9.6	1.7748	11.3748	0.867884	1
parallel	with_process_cache	320	29.58	349.58	9.6	1.7748	11.3748	0.867884	1
parallel	with_persistent_cache	0	0	0	0	0	0	0	0

## Sheet: sum
execution_type	cache_type	request_tokens	response_tokens	total_tokens	request_cost	response_cost	total_cost	execution_duration	execution_cost
sequential	no_cache	16000	1479	17479	480	88.74	568.74	223.112	500
sequential	with_process_cache	16000	1479	17479	480	88.74	568.74	223.112	500
sequential	with_persistent_cache	0	0	0	0	0	0	0	0
parallel	no_cache	16000	1479	17479	480	88.74	568.74	43.3942	50
parallel	with_process_cache	16000	1479	17479	480	88.74	568.74	43.3942	50
parallel	with_persistent_cache	0	0	0	0	0	0	0	0
