# Supplementary material
Source: ML conference proceedings conference paper supplement (https://openreview.net/forum?id=UZlJY3uV6P)
Supplement: supplementary_material [file test_optimizer_study_measurement.xlsx]

## Sheet: mean_total_measurements
execution_type	cache_type	request_tokens	response_tokens	total_tokens	request_cost	response_cost	total_cost	execution_duration	execution_cost
sequential	no_cache	320	29.58	349.58	9.6	1.7748	11.3748	4.46224	10
sequential	with_process_cache	320	29.58	349.58	9.6	1.7748	11.3748	4.46224	10
sequential	with_persistent_cache	0	0	0	0	0	0	0	0
parallel	no_cache	320	29.58	349.58	9.6	1.7748	11.3748	0.867884	1
parallel	with_process_cache	320	29.58	349.58	9.6	1.7748	11.3748	0.867884	1
parallel	with_persistent_cache	0	0	0	0	0	0	0	0

## Sheet: sum_total_measurements
execution_type	cache_type	request_tokens	response_tokens	total_tokens	request_cost	response_cost	total_cost	execution_duration	execution_cost
sequential	no_cache	160000	14790	174790	4800	887.4	5687.4	2231.12	5000
sequential	with_process_cache	160000	14790	174790	4800	887.4	5687.4	2231.12	5000
sequential	with_persistent_cache	0	0	0	0	0	0	0	0
parallel	no_cache	160000	14790	174790	4800	887.4	5687.4	433.942	500
parallel	with_process_cache	160000	14790	174790	4800	887.4	5687.4	433.942	500
parallel	with_persistent_cache	0	0	0	0	0	0	0	0
