# Supplementary material
Source: ML conference proceedings conference paper supplement (https://openreview.net/forum?id=UZlJY3uV6P)
Supplement: supplementary_material [file tot_sorting_study_best_run.xlsx]

## Sheet: global_evaluation_measurements
total_execution_duration
12.7088

## Sheet: dataset_evaluator_parameters
section	name	map	confidence_interval_width	acceptable_ci_width	parameter	value
score_parameters	mistakes	<function mean at 0x1014387c0>	0.95
score_parameters	cost	<function mean at 0x1014387c0>	0.95
global_parameters					min_runs	10
global_parameters					max_runs	9.22337e+18

## Sheet: scores
name	value	confidence_interval_width
mistakes	17.88	2.79315
cost	0.157217	0.00248186

## Sheet: mean
execution_type	cache_type	request_tokens	response_tokens	total_tokens	request_cost	response_cost	total_cost	execution_duration	execution_cost
sequential	no_cache	191154	41093.1	232247	0.0955772	0.0616396	0.157217	428.612	98
sequential	with_process_cache	191154	41093.1	232247	0.0955772	0.0616396	0.157217	428.612	98
sequential	with_persistent_cache	20278.8	3885.5	24164.3	0.0101394	0.00582825	0.0159676	41.4862	9.74
parallel	no_cache	191154	41093.1	232247	0.0955772	0.0616396	0.157217	50.5209	7
parallel	with_process_cache	191154	41093.1	232247	0.0955772	0.0616396	0.157217	50.5209	7
parallel	with_persistent_cache	20278.8	3885.5	24164.3	0.0101394	0.00582825	0.0159676	6.39422	0.86

## Sheet: sum
execution_type	cache_type	request_tokens	response_tokens	total_tokens	request_cost	response_cost	total_cost	execution_duration	execution_cost
sequential	no_cache	9557716	2054655	11612371	4.77886	3.08198	7.86084	21430.6	4900
sequential	with_process_cache	9557716	2054655	11612371	4.77886	3.08198	7.86084	21430.6	4900
sequential	with_persistent_cache	1013940	194275	1208215	0.50697	0.291413	0.798382	2074.31	487
parallel	no_cache	9557716	2054655	11612371	4.77886	3.08198	7.86084	2526.05	350
parallel	with_process_cache	9557716	2054655	11612371	4.77886	3.08198	7.86084	2526.05	350
parallel	with_persistent_cache	1013940	194275	1208215	0.50697	0.291413	0.798382	319.711	43
