# Supplementary material
Source: ML conference proceedings conference paper supplement (https://openreview.net/forum?id=UZlJY3uV6P)
Supplement: supplementary_material [file tot_sorting_study_best_run.xlsx]

## Sheet: global_evaluation_measurements
total_execution_duration
18.3203

## Sheet: dataset_evaluator_parameters
section	name	map	confidence_interval_width	acceptable_ci_width	parameter	value
score_parameters	mistakes	<function mean at 0x104f3e200>	0.95
score_parameters	mistakes_penalized	<function mean at 0x104f3e200>	0.95
global_parameters					min_runs	10
global_parameters					max_runs	9.22337e+18

## Sheet: scores
name	value	confidence_interval_width
mistakes	24.16	3.6519
mistakes_penalized	25.8524	4.1197

## Sheet: mean
execution_type	cache_type	request_tokens	response_tokens	total_tokens	request_cost	response_cost	total_cost	execution_duration	execution_cost
sequential	no_cache	69658.4	15493.5	85152	0.0348292	0.0232403	0.0580695	169.412	36
sequential	with_process_cache	69658.4	15493.5	85152	0.0348292	0.0232403	0.0580695	169.412	36
sequential	with_persistent_cache	0	0	0	0	0	0	0	0
parallel	no_cache	69658.4	15493.5	85152	0.0348292	0.0232403	0.0580695	40.6601	6
parallel	with_process_cache	69658.4	15493.5	85152	0.0348292	0.0232403	0.0580695	40.6601	6
parallel	with_persistent_cache	0	0	0	0	0	0	0	0

## Sheet: sum
execution_type	cache_type	request_tokens	response_tokens	total_tokens	request_cost	response_cost	total_cost	execution_duration	execution_cost
sequential	no_cache	3482922	774677	4257599	1.74146	1.16202	2.90348	8470.61	1800
sequential	with_process_cache	3482922	774677	4257599	1.74146	1.16202	2.90348	8470.61	1800
sequential	with_persistent_cache	0	0	0	0	0	0	0	0
parallel	no_cache	3482922	774677	4257599	1.74146	1.16202	2.90348	2033.01	300
parallel	with_process_cache	3482922	774677	4257599	1.74146	1.16202	2.90348	2033.01	300
parallel	with_persistent_cache	0	0	0	0	0	0	0	0
