# Supplementary material
Source: ML conference proceedings conference paper supplement (https://openreview.net/forum?id=UZlJY3uV6P)
Supplement: supplementary_material [file tot_sorting_study_best_run.xlsx]

## Sheet: global_evaluation_measurements
total_execution_duration
29.8297

## Sheet: dataset_evaluator_parameters
section	name	map	confidence_interval_width	acceptable_ci_width	parameter	value
score_parameters	mistakes	<function mean at 0x106368040>	0.95
score_parameters	cost	<function mean at 0x106368040>	0.95
global_parameters					min_runs	10
global_parameters					max_runs	9.22337e+18

## Sheet: scores
name	value	confidence_interval_width
mistakes	18.06	3.09284
cost	0.168339	0.00288424

## Sheet: mean
execution_type	cache_type	request_tokens	response_tokens	total_tokens	request_cost	response_cost	total_cost	execution_duration	execution_cost
sequential	no_cache	204758	43973.3	248731	0.102379	0.06596	0.168339	474.257	105
sequential	with_process_cache	204758	43973.3	248731	0.102379	0.06596	0.168339	474.257	105
sequential	with_persistent_cache	0	0	0	0	0	0	0	0
parallel	no_cache	204758	43973.3	248731	0.102379	0.06596	0.168339	56.3551	7
parallel	with_process_cache	204758	43973.3	248731	0.102379	0.06596	0.168339	56.3551	7
parallel	with_persistent_cache	0	0	0	0	0	0	0	0

## Sheet: sum
execution_type	cache_type	request_tokens	response_tokens	total_tokens	request_cost	response_cost	total_cost	execution_duration	execution_cost
sequential	no_cache	10237890	2198666	12436556	5.11895	3.298	8.41694	23712.9	5250
sequential	with_process_cache	10237890	2198666	12436556	5.11895	3.298	8.41694	23712.9	5250
sequential	with_persistent_cache	0	0	0	0	0	0	0	0
parallel	no_cache	10237890	2198666	12436556	5.11895	3.298	8.41694	2817.76	350
parallel	with_process_cache	10237890	2198666	12436556	5.11895	3.298	8.41694	2817.76	350
parallel	with_persistent_cache	0	0	0	0	0	0	0	0
