# Supplementary material
Source: ML conference proceedings conference paper supplement (https://openreview.net/forum?id=UZlJY3uV6P)
Supplement: supplementary_material [file tot_sorting_study_measurement.xlsx]

## Sheet: mean_total_measurements
execution_type	cache_type	request_tokens	response_tokens	total_tokens	request_cost	response_cost	total_cost	execution_duration	execution_cost
sequential	no_cache	94413.5	21026.4	115440	0.0472067	0.0315396	0.0787464	226.703	49.06
sequential	with_process_cache	94413.5	21026.4	115440	0.0472067	0.0315396	0.0787464	226.703	49.06
sequential	with_persistent_cache	20410.7	4074.03	24484.7	0.0102053	0.00611104	0.0163164	46.1756	9.9604
parallel	no_cache	94413.5	21026.4	115440	0.0472067	0.0315396	0.0787464	41.9535	5.84
parallel	with_process_cache	94413.5	21026.4	115440	0.0472067	0.0315396	0.0787464	41.9535	5.84
parallel	with_persistent_cache	20410.7	4074.03	24484.7	0.0102053	0.00611104	0.0163164	9.35251	1.2108

## Sheet: sum_total_measurements
execution_type	cache_type	request_tokens	response_tokens	total_tokens	request_cost	response_cost	total_cost	execution_duration	execution_cost
sequential	no_cache	236033727	52566032	288599759	118.017	78.849	196.866	566757	122650
sequential	with_process_cache	236033727	52566032	288599759	118.017	78.849	196.866	566757	122650
sequential	with_persistent_cache	51026722	10185069	61211791	25.5134	15.2776	40.791	115439	24901
parallel	no_cache	236033727	52566032	288599759	118.017	78.849	196.866	104884	14600
parallel	with_process_cache	236033727	52566032	288599759	118.017	78.849	196.866	104884	14600
parallel	with_persistent_cache	51026722	10185069	61211791	25.5134	15.2776	40.791	23381.3	3027
