# Supplementary material
Source: ML conference proceedings conference paper supplement (https://openreview.net/forum?id=UZlJY3uV6P)
Supplement: supplementary_material [file tot_sorting_study_measurement.xlsx]

## Sheet: mean_total_measurements
execution_type	cache_type	request_tokens	response_tokens	total_tokens	request_cost	response_cost	total_cost	execution_duration	execution_cost
sequential	no_cache	146088	32151.6	178240	0.0730442	0.0482275	0.121272	344.923	75.82
sequential	with_process_cache	146088	32151.6	178240	0.0730442	0.0482275	0.121272	344.923	75.82
sequential	with_persistent_cache	23130.6	4583.55	27714.2	0.0115653	0.00687532	0.0184406	51.2563	11.2712
parallel	no_cache	146088	32151.6	178240	0.0730442	0.0482275	0.121272	46.2645	5.92
parallel	with_process_cache	146088	32151.6	178240	0.0730442	0.0482275	0.121272	46.2645	5.92
parallel	with_persistent_cache	23130.6	4583.55	27714.2	0.0115653	0.00687532	0.0184406	10.0282	1.3416

## Sheet: sum_total_measurements
execution_type	cache_type	request_tokens	response_tokens	total_tokens	request_cost	response_cost	total_cost	execution_duration	execution_cost
sequential	no_cache	365221228	80379123	445600351	182.611	120.569	303.179	862307	189550
sequential	with_process_cache	365221228	80379123	445600351	182.611	120.569	303.179	862307	189550
sequential	with_persistent_cache	57826588	11458866	69285454	28.9133	17.1883	46.1016	128141	28178
parallel	no_cache	365221228	80379123	445600351	182.611	120.569	303.179	115661	14800
parallel	with_process_cache	365221228	80379123	445600351	182.611	120.569	303.179	115661	14800
parallel	with_persistent_cache	57826588	11458866	69285454	28.9133	17.1883	46.1016	25070.5	3354
